# Supplementary material
Source: publisher figshare collection journal article supplement (https://acs.figshare.com/ndownloader/files/4267213)
Supplement: Supplementary file 1 [file 4267213]

## Supplement Data

**Figure S1.** ESI mass spectra of Dst with the DNA duplex containing two ATAT sites at two concentration ratios of compound to binding site: 1:1 and 2:1. The label [n: 2] (n=1, 2, 3, 4) represents the two binding sites that have been bound by n ligands of Dst at five charge states (z= 10, 9, 8, 7, 6).

**Figure S2.** ESI mass spectra of Dst with the DNA duplex containing two ATATA sites at two different concentration ratios, 1:1 and 2:1, of compound to binding sites. The labels are as in Figure S1.

**Figure S3.** ESI mass spectra of Dst with the DNA duplex containing two ATATAT sites in two different concentration ratios to binding site: 1:1 and 2:1. The labels are as in Figure S1.

**Figure S4.** ESI mass spectra of Dst with the 22 base pair DNA hairpin containing one ATATA site in two different concentration ratios, 1:1 and 2:1, compound to binding site. The label [1:1] and [2:1] represent the binding site that has been bound by one or two ligands of Dst at two charge states (z=5, 4).

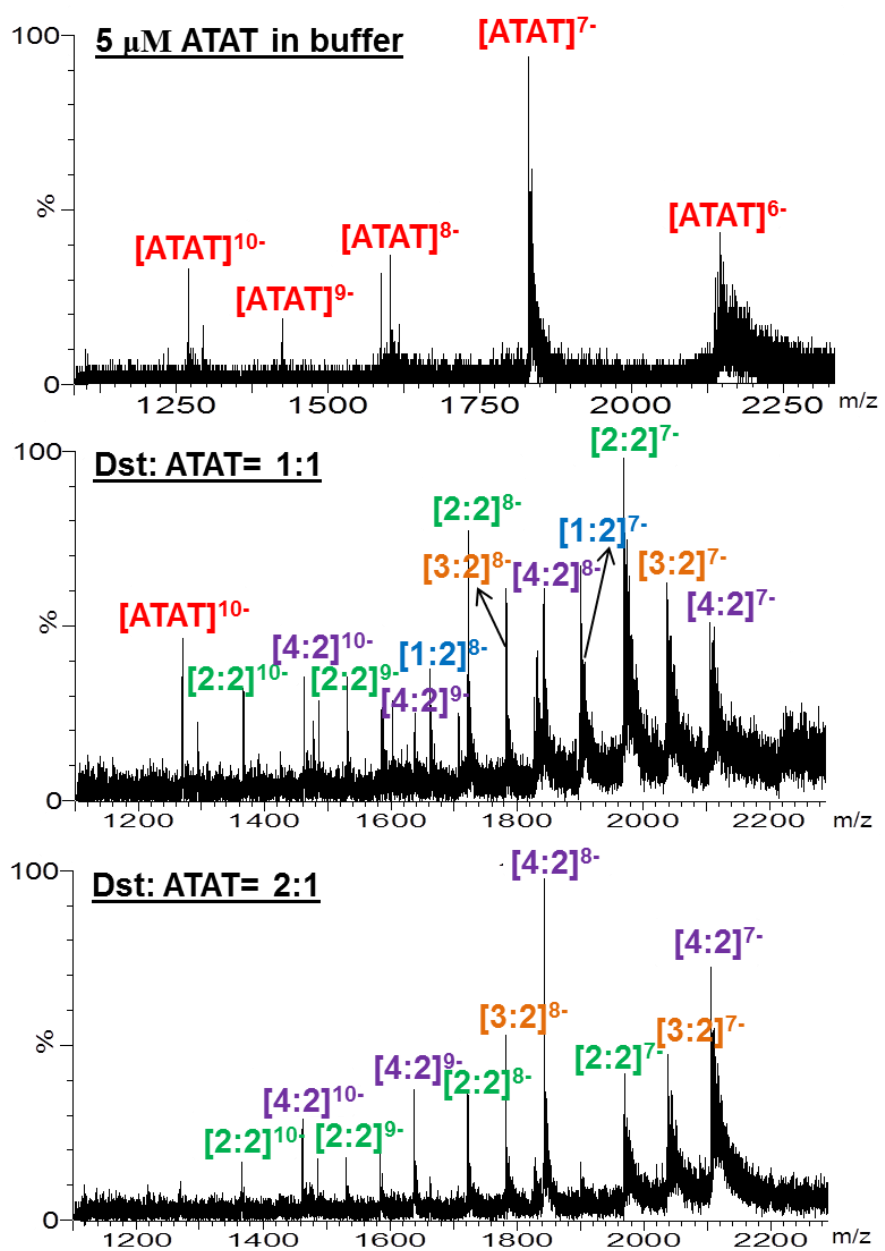

Figure S1

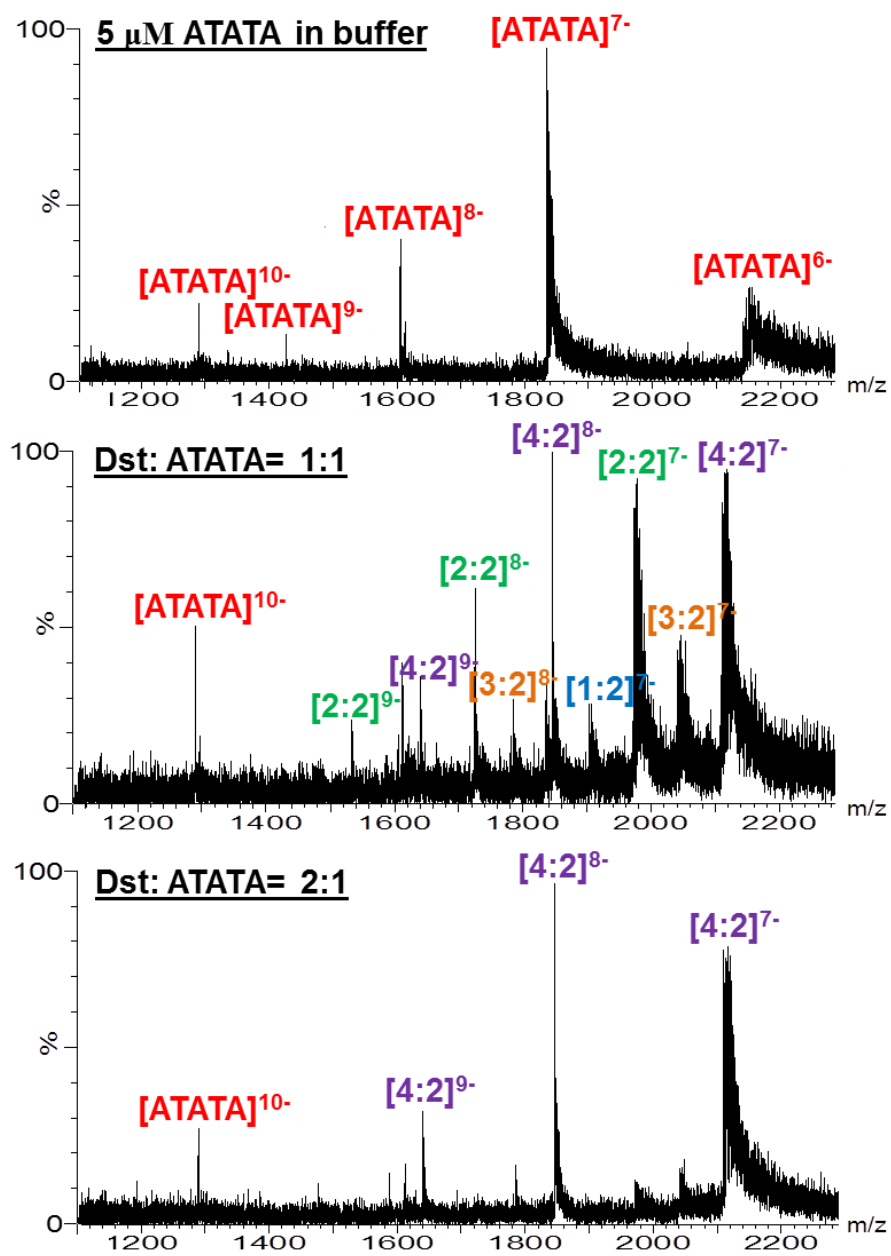

Figure S2

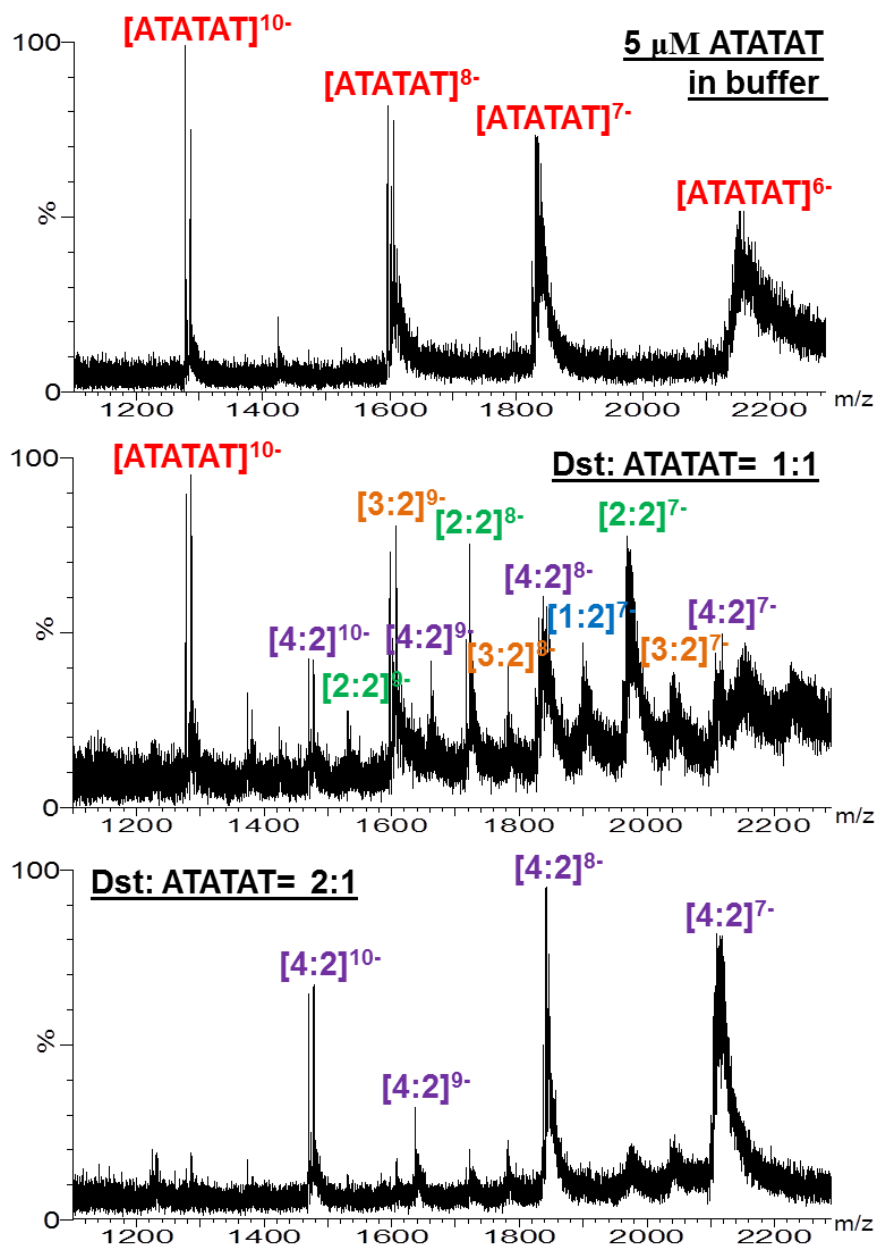

Figure S3

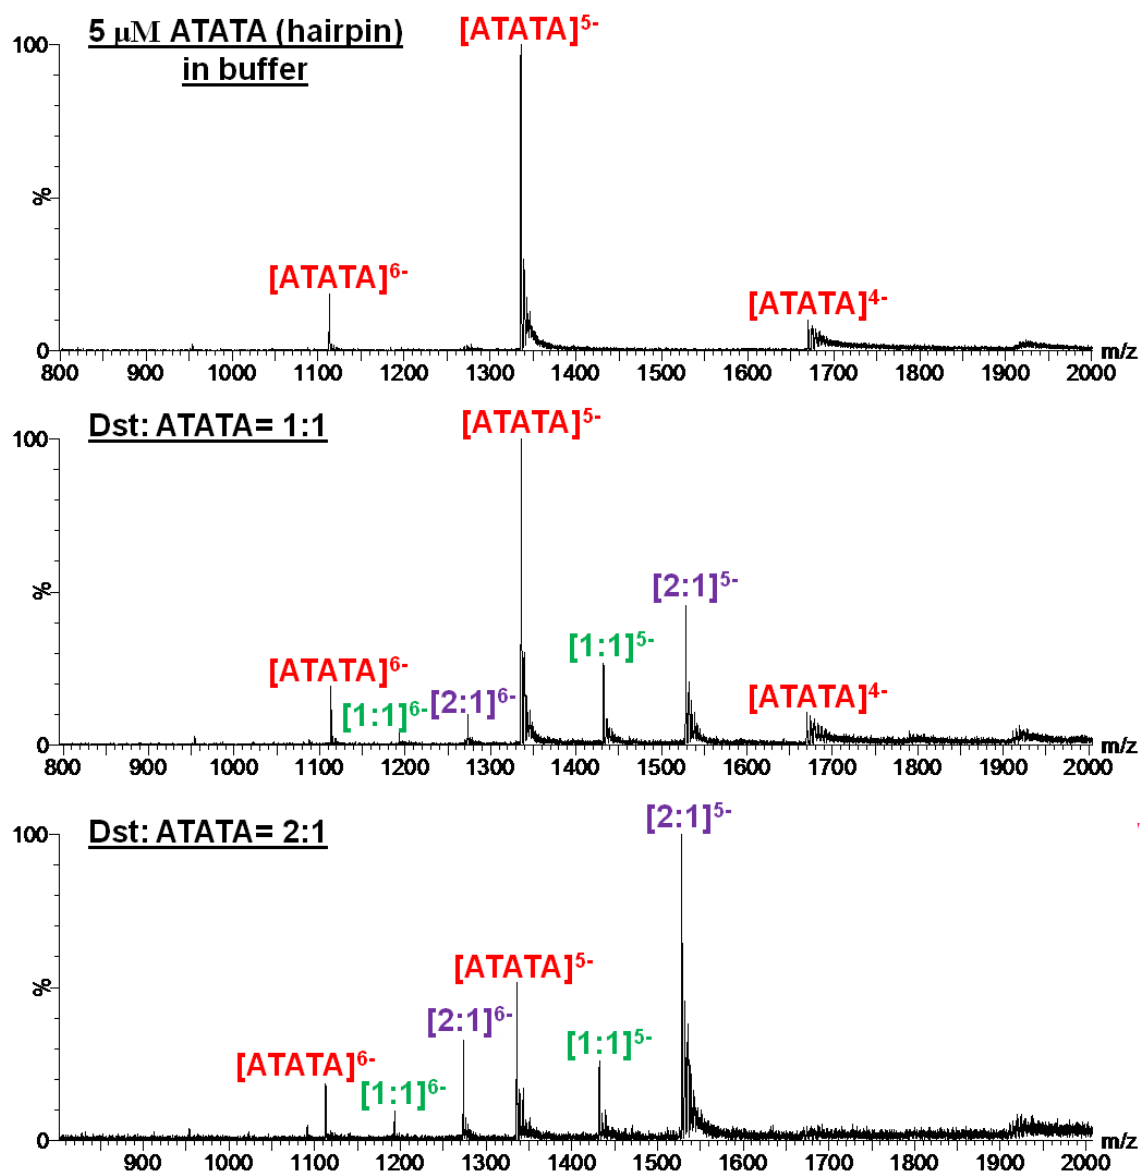

Figure S4
